# Supplementary material
Source: PubMed Central journal article supplement (PMC10754272)
Supplement: NIHMS1952359-supplement-Supplementary_Figure_1.pdf [file NIHMS1952359-supplement-Supplementary_Figure_1.pdf]

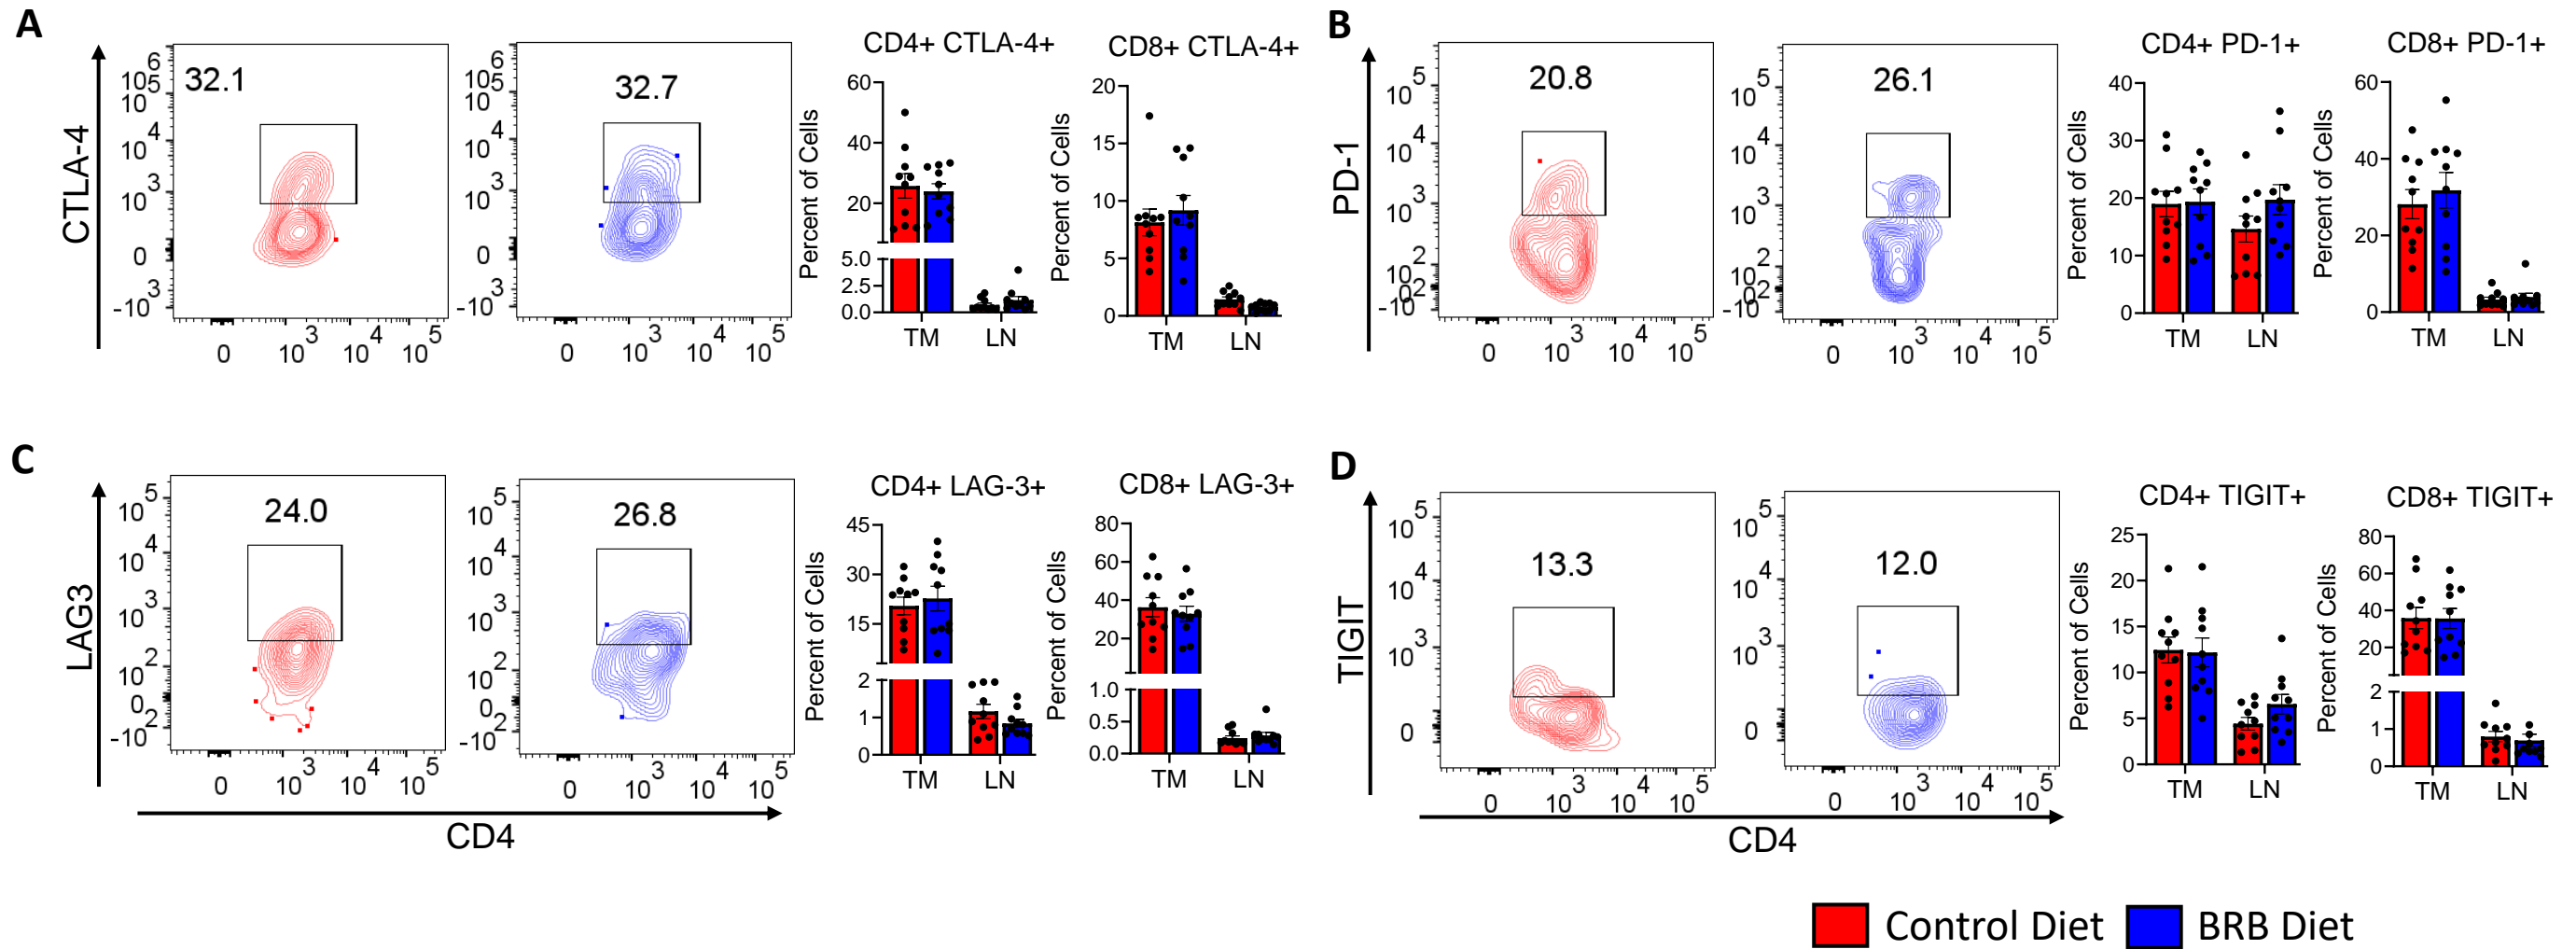

**Supplementary Figure 1: (A-D)** Representative flow cytometry plots and bar graphs showing average percentage of **(A)** CTLA4+, **(B)** PD-1+, **(C)** LAG3+, and **(D)** TIGIT+ producing CD4+ and CD8+ T cells, in tumors (TM) and tumor draining lymph nodes (LN) of HNSCC induced *Tgfβ1/Pten* 2cKO mice fed control or BRB supplemented diet. Data are presented as mean  $\pm$  SE.
